# Supplementary material for: Elevated Microbially-Derived Metabolites in Autism: A Possible Diagnostic Screening Test for a Distinct ASD Phenotype
Source: Research Square preprint supplement (doi:10.21203/rs.3.rs-7643826/v1), 2025-10-02
Supplement: Supplementary file 1 [file 0fbed72bd4753ae938fac5a3.docx]

Supplement:

| **Table A: Performance characteristics of the MDM system for the untargeted and targeted results.** The MDM predictions of ASD vs TD diagnosis are generally in good agreement with actual diagnoses, with some differences. TP-True Positive, FP-False Positive, FN-False Negative, TN-True Negative. | | | | | | | | |
| --- | --- | --- | --- | --- | --- | --- | --- | --- |
| Semiquantitative | ASD Diagnosis | | |  | Quantitative | ASD Diagnosis | | |
| MDM System | Positive | Negative | Total |  | MDM System | Positive | Negative | Total |
| Positive | 45  (TP) | 0  (FP) | 45 |  | Positive | 40  (TP) | 0  (FP) | 40 |
| Negative | 5  (FN) | 47  (TN) | 52 |  | Negative | 12  (FN) | 47  (TN) | 59 |
| Total | 50 | 47 | 97 |  | Total | 52 | 47 | 99 |
|  |  |  |  |  |  |  |  |  |

Table A: Matrix of TP, TN, FN, FP values for the MDM System both in quantitative mode as well as qualitative mode.

Description of multivariate analysis techniques:

To protect against overfitting the data, validation was further conducted in the classification learner application of MATLAB using multiple cross-fold validation (Range 2-50), and by holding back various percentages of ASD and TD participants at random as a test set.

Fisher Discriminant Analysis:

Fisher Discriminant Analysis (FDA) is a dimensionality reduction technique and classifier designed to maximize class separability in datasets99. It achieves this by projecting high-dimensional data onto a lower-dimensional space where the between-class distance is maximized and within-class variance is minimized. FDA assumes linear separability and normal distribution within classes, making it effective for classification tasks when these assumptions hold, though it may struggle with highly nonlinear or imbalanced datasets100.

Neural Networks:

Artificial neural networks are models consisting of interconnected layers of nodes that process input data through weighted connections and nonlinear activation functions. This architecture enables the network to learn complex, hierarchical patterns in data, making it effective for classification problems where the classes are not linearly separable. Neural networks approximate nonlinear decision boundaries by adjusting internal parameters through training using algorithms such as backpropagation, allowing them to outperform linear methods in many classification tasks.

Naïve Bayes

In MATLAB, Naive Bayes classification for categorical data assumes that predictor variables are conditionally independent given the class label. Using the built-in Classification Learner App, this method applies Bayes’ Theorem to estimate class posteriors from training data. The model is efficient for high-dimensional categorical datasets and is well-suited for applications where quick, interpretable classification is needed. MATLAB automates the training, cross-validation, and prediction steps, making it easy to deploy Naive Bayes models without manual coding, while still allowing visualization and performance evaluation through confusion matrices, ROC curves, and loss plots99.

Table B: Multivariate statistical techniques utilizing semiquantitative analysis

| Other multivariate statistical analysis techniques: | Accuracy with Cross Validation |
| --- | --- |
| Fischer Discriminant Analysis: (5 metabolites) | 86% |
| Neural Networks:  (32 metabolites) | 83% |
| Naïve Bayes:  (32 metabolites) | 82% |

Cross-validation is a model assessment technique used to evaluate a machine learning algorithm's performance in making predictions on new datasets that it has not been trained on. This is done by partitioning the known dataset, using a subset to train the algorithm and the remaining data for testing.

Quantitative Multivariate Analysis:

Table C: Fisher discriminant analysis results using targeted the targeted quantitative technique.

| Quantitative Results | Number of combinations with AUROC > 0.7 | Maximum AUROC |
| --- | --- | --- |
| 3 Metabolites | 399 | 0.7767 |
| 4 Metabolites | 4,218 | 0.7818 |
| 5 Metabolites | 28,289 | 0.7902 |
| 6 Metabolites | 133,674 | 0.8018 |

Table D:

The following table contains the mean, median, and 25th and 75th percentile for each quantiatively measured metabolite, and is an extension of table 5.

| Phenylalanine Based Metabolites | | | | |  |  |  |  |
| --- | --- | --- | --- | --- | --- | --- | --- | --- |
|  | Mean ASD | ASD 25th Percentile | ASD Median | ASD 75th Percentile | Mean TD | TD 25th Percentile | TD Median | TD 75th Percentile |
| 4-methyl phenol | 0.44 | 0.20 | 0.37 | 0.64 | 0.25 | 0.12 | 0.18 | 0.39 |
| Benzoic Acid | 1.26 | 0.36 | 0.64 | 1.14 | 0.71 | 0.26 | 0.45 | 1.03 |
| benzoic/hippuric | 0.02 | 0.01 | 0.01 | 0.02 | 0.01 | 0.01 | 0.01 | 0.01 |
| p-Cresol Sulphate | 2564 | 366 | 1053 | 2749 | 1072 | 387 | 695 | 1809 |
| Dihydroxyphenyl propionic Acid | 0.64 | 0.16 | 0.36 | 0.67 | 0.56 | 0.28 | 0.48 | 0.83 |
| Hippuric Acid | 84 | 32 | 49 | 93 | 54 | 31 | 47 | 64 |
| Hydroxybenzoic acid | 4.73 | 0.45 | 1.33 | 3.57 | 1.03 | 0.00 | 0.47 | 1.69 |
| Phe/Tyr | 1.65 | 0.83 | 0.95 | 1.52 | 1.22 | 0.87 | 1.05 | 1.38 |
| Phenylacetic Acid | 1.50 | 0.50 | 1.11 | 1.86 | 1.17 | 0.70 | 1.10 | 1.51 |
| Phenyl propionic Acid | 0.01 | 0.00 | 0.00 | 0.00 | 0.03 | 0.00 | 0.00 | 0.01 |
|  |  |  |  |  |  |  |  |  |
| Tryptophan Based Metabolites | | | |  |  |  |  |  |
|  | Mean ASD | ASD 25th Percentile | ASD Median | ASD 75th Percentile | Mean TD | TD 25th Percentile | TD Median | TD 75th Percentile |
| IAG | 7.95 | 1.99 | 3.50 | 9.23 | 3.77 | 1.67 | 3.02 | 5.59 |
| 3-indole propionic acid | 0.02 | 0.01 | 0.01 | 0.02 | 0.01 | 0.00 | 0.01 | 0.01 |
| indole-3-carbaldehyde | 0.02 | 0.00 | 0.00 | 0.02 | 0.01 | 0.00 | 0.00 | 0.01 |
| phenylacetyl-l-glutamine | 0.80 | 0.37 | 0.61 | 1.08 | 0.44 | 0.19 | 0.33 | 0.60 |
| 3-methyl-2-oxindole | 0.00 | 0.00 | 0.00 | 0.00 | 0.00 | 0.00 | 0.00 | 0.00 |
| Indoxyl Sulfate (Indican) | 43 | 6 | 17 | 39 | 16 | 3 | 7 | 22 |
| 2-oxindole | 0.00 | 0.00 | 0.00 | 0.00 | 0.00 | 0.00 | 0.00 | 0.00 |
| 3-indole acetonitrile | 0.00 | 0.00 | 0.00 | 0.00 | 0.00 | 0.00 | 0.00 | 0.00 |
| tetrahydro carboline | 0.022 | 0.004 | 0.009 | 0.019 | 0.008 | 0.002 | 0.004 | 0.010 |
| 5-methoxyindole | 0.000 | 0.000 | 0.000 | 0.000 | 0.000 | 0.000 | 0.000 | 0.000 |
|  |  |  |  |  |  |  |  |  |
| Other Microbial Metabolites: | | | | |  |  |  |  |
|  | Mean ASD | ASD 25th Percentile | ASD Median | ASD 75th Percentile | Mean TD | TD 25th Percentile | TD Median | TD 75th Percentile |
| Arabinitol | 37 | 20 | 31 | 46 | 27 | 15 | 23 | 30 |
| Citramalic Acid | 0.11 | 0.03 | 0.05 | 0.08 | 0.06 | 0.03 | 0.04 | 0.07 |
| Tartaric Acid | 0.274 | 0.000 | 0.000 | 0.001 | 0.053 | 0.000 | 0.000 | 0.003 |
| Tricarballylic Acid | 0.845 | 0.000 | 0.000 | 0.000 | 0.001 | 0.000 | 0.000 | 0.000 |

Table E: Correlation of Metabolites of interest. A-Arabinitol. Phe/Tyr-Phenylalanine/Tyrosine Ratio, TA-Tartaric Acid, CMA-Citramalic Acid, DHPPA, Dihydroxyphenyl acetic acid, HA-Hippuric Acid, HBA-Hydroxybenzoic Acid, IS-Indoxyl sulfate, BA-Benzoic Acid, PAA-Phenylacetic acid, PPA-Phenyl propanoic Acid, IAG-Indoylacroylglycine, pCS-p-Cresol Sulfate, BA/HA-Ratio of BA/HA, 2OI-2 Oxoindole, IC3-Indole 3 Carbaldehyde, 3AN-Indole Acetyl Nitrile, MOI-Methoxyindole, PAG-Phenylacetylglutamine, BC-Beta Carboline. Yellow highlight-Statistically significant using Pearson’s coefficient after accounting for false discovery, Green Highlight-Correlation > 0.75, Significant, but removed for false discovery analysis.
